# Supplementary material
Source: HighWire-hosted journal article supplement (https://www.annfammed.org/highwire/filestream/790/field_highwire_adjunct_files/0/Lichkus_Supp_App.pdf)

**Supplemental material for:**

Lichkus J, Liaw W, Phillips RL. Utilizing PHATE: a population health mapping tool to identify areas of food insecurity. *Ann Fam Med*. 2019;17(4):372.

**Key words:** social determinants of health; food insecurity; primary care

Submitted October 20, 2018; submitted, revised, January 6, 2019; accepted January 29, 2019.

**Funding support:** This work was supported by the American Board of Family Medicine Visiting Scholar Program and the American Board of Family Medicine Foundation.

Supplemental Figure 1. Census tracts with 70% of patients who screened positive for food insecurity in 2018, Lawrence, Massachusetts.

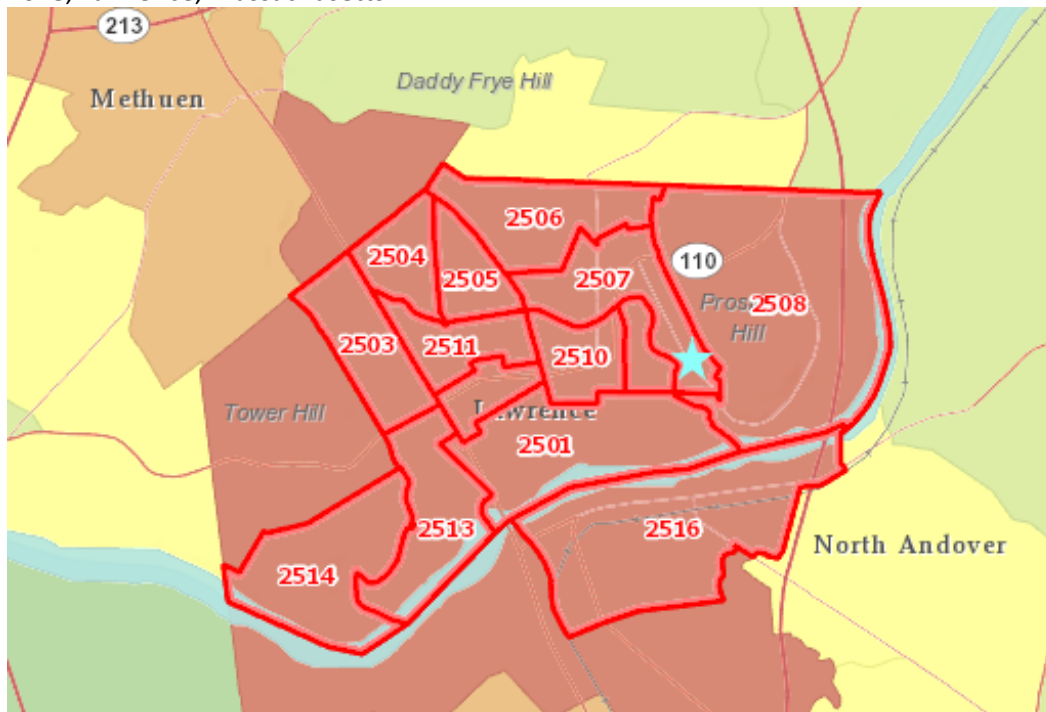

Supplement: Lichkus_Supp_App.pdf [file Lichkus_Supp_App.pdf]
